# Supplementary material for: The ecological niche characteristics and interspecific associations of plant species in the alpine meadow of the Tibetan Plateau affected plant species diversity under nitrogen addition
Source: PeerJ. 2024 Nov 21;12:e18526. doi: 10.7717/peerj.18526 (PMC11586050; doi:10.7717/peerj.18526)
Supplement: Supplemental Information 1 [file peerj-12-18526-s001.xlsx]

## Sheet: Plant community diversity
CK		Plant height	coverage	density	Dry weight	Relative heigh	Relative coverage	Relative density	Relative biomass	Importance value	ln(pi)	pi*lnpi	The total	H	R=S	LNS	J=H/LNS
CK-1	Festuca ovina L.	17.8	0.02	23	2.53	0.19539	0.027027	0.0111596	0.0214334	0.0637524	-2.75275	-0.175494	-1.88938	1.88938	13	2.56495	0.736615
	Poa annua L.	16.4	0.1	87	8.7	0.180022	0.135135	0.0422125	0.0737038	0.107768	-2.22777	-0.240083
	Elymus dahuricus Turcz.	37.4	0.02	51	6.39	0.410538	0.027027	0.0247453	0.0541342	0.129111	-2.04708	-0.264301
	Gentiana scabra Bunge	6.4	0.01	6	5.74	0.0702525	0.0135135	0.00291121	0.0486276	0.0338262	-3.38652	-0.114553
	Potentilla chinensis Ser.	1.2	0.03	27	12.32	0.0131723	0.0405405	0.0131004	0.104371	0.0427962	-3.15131	-0.134864
	Taraxacum mongolicum Hand.Mazz.	2.6	0.01	20	8.31	0.0285401	0.0135135	0.00970403	0.0703999	0.0305394	-3.48874	-0.106544
	Thalictrum aquilegiifolium var. sibiricum Linnaeus	1.2	0.01	10	3.21	0.0131723	0.0135135	0.00485201	0.0271942	0.014683	-4.22106	-0.0619779
	Herb of Tibet Lancea	1.1	0.01	20	3.7	0.0120746	0.0135135	0.00970403	0.0313453	0.0166594	-4.09478	-0.0682165
	Carex alatauensis S. R. Zhang	1.6	0.38	1780	50.01	0.0175631	0.513514	0.863658	0.42367	0.454601	-0.788335	-0.358378
	Oxytropis ochrocephala Bunge	1.2	0.03	8	3.7	0.0131723	0.0405405	0.00388161	0.0313453	0.0222349	-3.80609	-0.0846282
	Aster tataricus L. f.	1.4	0.1	9	8.3	0.0153677	0.135135	0.00436681	0.0703151	0.0562962	-2.87713	-0.161971
	Anaphalis lactea Maxim.	0	0	0	0	0	0	0	0	0	0	0
	Bistorta vivipara (L.) Gray	0	0	0	0	0	0	0	0	0	0	0
	Pedicularis Linn.	1.7	0.01	10	3.1	0.0186608	0.0135135	0.00485201	0.0262623	0.0158222	-4.14634	-0.0656041
	Gentiana macrophylla Pall.	0	0	0	0	0	0	0	0	0	0	0
	Saussurea japonica (Thunb.) DC.	0	0	0	0	0	0	0	0	0	0	0
	Ranunculus japonicus Thunb.	1.1	0.01	10	2.03	0.0120746	0.0135135	0.00485201	0.0171976	0.0119094	-4.43042	-0.0527638
		91.1	0.74	2061	118.04
CK-2	Festuca ovina L.	18.6	0.01	13	1.57	0.225182	0.016129	0.00718232	0.0159992	0.066123	-2.71624	-0.179606	-1.83892	1.83892	13	2.56495	0.716943
	Poa annua L.	17.1	0.1	62	5.14	0.207022	0.16129	0.0342541	0.0523795	0.113736	-2.17387	-0.247248
	Elymus dahuricus Turcz.	31.2	0.05	41	5.09	0.377724	0.0806452	0.0226519	0.05187	0.133223	-2.01573	-0.268541
	Gentiana scabra Bunge	2.6	0.01	12	8.4	0.031477	0.016129	0.00662983	0.0856007	0.0349591	-3.35358	-0.117238
	Potentilla chinensis Ser.	3.6	0.01	28	2.4	0.0435835	0.016129	0.0154696	0.0244574	0.0249099	-3.69249	-0.0919795
	Taraxacum mongolicum Hand.Mazz.	1.5	0.01	30	2.3	0.0181598	0.016129	0.0165746	0.0234383	0.0185754	-3.98592	-0.0740401
	Thalictrum aquilegiifolium var. sibiricum Linnaeus	0	0	0	0	0	0	0	0	0	0	0
	Herb of Tibet Lancea	1.2	0.01	25	2.21	0.0145278	0.016129	0.0138122	0.0225211	0.0167475	-4.0895	-0.0684891
	Carex alatauensis S. R. Zhang	1.1	0.35	1550	41.1	0.0133172	0.564516	0.856354	0.418832	0.463255	-0.769478	-0.356464
	Oxytropis ochrocephala Bunge	1.3	0.03	24	15.3	0.0157385	0.0483871	0.0132597	0.155916	0.0583252	-2.84172	-0.165744
	Aster tataricus L. f.	1.1	0.01	14	11.42	0.0133172	0.016129	0.00773481	0.116376	0.0383893	-3.25998	-0.125148
	Anaphalis lactea Maxim.	0	0	0	0	0	0	0	0	0	0	0
	Bistorta vivipara (L.) Gray	1.2	0.01	3	1.1	0.0145278	0.016129	0.00165746	0.0112096	0.010881	-4.52074	-0.0491901
	Pedicularis Linn.	0	0	0	0	0	0	0	0	0	0	0
	Gentiana macrophylla Pall.	0	0	0	0	0	0	0	0	0	0	0
	Saussurea japonica (Thunb.) DC.	1.1	0.01	4	1.1	0.0133172	0.016129	0.00220994	0.0112096	0.0107164	-4.53598	-0.0486095
	Ranunculus japonicus Thunb.	1	0.01	4	1	0.0121065	0.016129	0.00220994	0.0101906	0.010159	-4.58939	-0.0466237
		82.6	0.62	1810	98.13
		82.6	0.62	1810	98.13
CK-3	Festuca ovina L.	15.6	0.01	13	3.11	0.171996	0.0149254	0.0071311	0.0375831	0.0579088	-2.84889	-0.164976	-1.83253	1.83253	13	2.56495	0.714451
	Poa annua L.	20.3	0.1	67	5.14	0.223815	0.149254	0.0367526	0.0621148	0.117984	-2.13721	-0.252156
	Elymus dahuricus Turcz.	26.7	0.1	62	6.01	0.294377	0.149254	0.0340099	0.0726284	0.137567	-1.98364	-0.272884
	Gentiana scabra Bunge	7.3	0.01	12	7.84	0.0804851	0.0149254	0.00658256	0.0947432	0.0491841	-3.01219	-0.148152
	Potentilla chinensis Ser.	1.2	0.01	2	1.2	0.0132304	0.0149254	0.00109709	0.0145015	0.0109386	-4.51546	-0.0493928
	Taraxacum mongolicum Hand.Mazz.	2.1	0.01	16	4.33	0.0231533	0.0149254	0.00877674	0.0523263	0.0247954	-3.6971	-0.091671
	Thalictrum aquilegiifolium var. sibiricum Linnaeus	1.1	0.01	4	1	0.0121279	0.0149254	0.00219419	0.0120846	0.010333	-4.57241	-0.0472468
	Herb of Tibet Lancea	2.1	0.01	21	2.7	0.0231533	0.0149254	0.0115195	0.0326284	0.0205566	-3.88457	-0.0798537
	Carex alatauensis S. R. Zhang	1.6	0.35	1548	30.1	0.0176406	0.522388	0.84915	0.363746	0.438231	-0.825009	-0.361545
	Oxytropis ochrocephala Bunge	1.4	0.01	12	1.8	0.0154355	0.0149254	0.00658256	0.0217523	0.0146739	-4.22168	-0.0619487
	Aster tataricus L. f.	1.8	0.03	32	14.32	0.0198456	0.0447761	0.0175535	0.173051	0.0638067	-2.7519	-0.175589
	Anaphalis lactea Maxim.	8.2	0.01	26	3.1	0.0904079	0.0149254	0.0142622	0.0374622	0.0392644	-3.23744	-0.127116
	Bistorta vivipara (L.) Gray	0	0	0	0	0	0	0	0	0	0	0
	Pedicularis Linn.	0	0	0	0	0	0	0	0	0	0	0
	Gentiana macrophylla Pall.	0	0	0	0	0	0	0	0	0	0	0
	Saussurea japonica (Thunb.) DC.	0	0	0	0	0	0	0	0	0	0	0
	Ranunculus japonicus Thunb.	1.3	0.01	8	2.1	0.014333	0.0149254	0.00438837	0.00438837	0.00950877	-4.65554	-0.0442685
		90.7	0.67	1823	82.75
N15
N15-1	Festuca ovina L.	21.4	0.01	12	1.13	0.208171	0.0125	0.00618876	0.0110991	0.0594898	-2.82195	-0.167877	-1.99908	1.99908	13	2.56495	0.779385
	Poa annua L.	26.7	0.15	44	19.11	0.259728	0.1875	0.0226921	0.187703	0.164406	-1.80542	-0.296821
	Elymus dahuricus Turcz.	20.9	0.05	40	10.11	0.203307	0.0625	0.0206292	0.0993026	0.0964348	-2.33889	-0.22555
	Gentiana scabra Bunge	7.5	0.01	20	8.81	0.0729572	0.0125	0.0103146	0.0865337	0.0455764	-3.08837	-0.140757
	Potentilla chinensis Ser.	3.6	0.05	60	3.1	0.0350195	0.0625	0.0309438	0.0304489	0.039728	-3.2257	-0.128151
	Taraxacum mongolicum Hand.Mazz.	3.6	0.01	27	6.02	0.0350195	0.0125	0.0139247	0.0591298	0.0301435	-3.50179	-0.105556
	Thalictrum aquilegiifolium var. sibiricum Linnaeus	2.5	0.01	11	3.2	0.0243191	0.0125	0.00567303	0.0314311	0.0184808	-3.99102	-0.0737573
	Herb of Tibet Lancea	2.4	0.01	5	5.8	0.0233463	0.0125	0.00257865	0.0569689	0.0238485	-3.73604	-0.0890987
	Carex alatauensis S. R. Zhang	2.9	0.33	1630	26.83	0.0282101	0.4125	0.84064	0.26353	0.38622	-0.951348	-0.36743
	Oxytropis ochrocephala Bunge	2.7	0.1	50	9.7	0.0262646	0.125	0.0257865	0.0952755	0.0680816	-2.68705	-0.182939
	Aster tataricus L. f.	3.9	0.05	26	5.9	0.0379377	0.0625	0.013409	0.0579511	0.0429495	-3.14773	-0.135193
	Anaphalis lactea Maxim.	0	0	0	0	0	0	0	0	0	0	0
	Bistorta vivipara (L.) Gray	1	0.01	10	1.1	0.00972763	0.0125	0.0051573	0.0108044	0.00954734	-4.65149	-0.0444094
	Pedicularis Linn.	0	0	0	0	0	0	0	0	0	0	0
	Gentiana macrophylla Pall.	0	0	0	0	0	0	0	0	0	0	0
	Saussurea japonica (Thunb.) DC.	1.1	0.01	4	1	0.0107004	0.0125	0.00206292	0.00982222	0.00877138	-4.73626	-0.0415436
	Ranunculus japonicus Thunb.	0	0	0	0	0	0	0	0	0	0	0
		102.8	0.8	1939	101.81
N15-2	Festuca ovina L.	20.3	0.01	8	1.13	0.188837	0.012987	0.00453772	0.0108227	0.0542962	-2.9133	-0.158181	-1.92437	1.92437	13	2.56495	0.750255
	Poa annua L.	29.7	0.15	115	30.15	0.276279	0.194805	0.0652297	0.288765	0.20627	-1.57857	-0.325611
	Elymus dahuricus Turcz.	28.7	0.1	72	6.02	0.266977	0.12987	0.0408395	0.0576573	0.123836	-2.0888	-0.258668
	Gentiana scabra Bunge	2.9	0.01	24	5.01	0.0269767	0.012987	0.0136132	0.0479839	0.0253902	-3.67339	-0.0932682
	Potentilla chinensis Ser.	3.1	0.02	8	5.18	0.0288372	0.025974	0.00453772	0.0496121	0.0272403	-3.60306	-0.0981483
	Taraxacum mongolicum Hand.Mazz.	6.2	0.01	23	7.2	0.0576744	0.012987	0.0130459	0.0689589	0.0381666	-3.2658	-0.124644
	Thalictrum aquilegiifolium var. sibiricum Linnaeus	2.2	0.01	30	3.2	0.0204651	0.012987	0.0170164	0.0306484	0.0202792	-3.89816	-0.0790517
	Herb of Tibet Lancea	3.6	0.01	26	2.22	0.0334884	0.012987	0.0147476	0.0212623	0.0206213	-3.88143	-0.0800402
	Carex alatauensis S. R. Zhang	3.5	0.3	1401	30.4	0.0325581	0.38961	0.794668	0.29116	0.376999	-0.975512	-0.367767
	Oxytropis ochrocephala Bunge	3	0.12	35	10.08	0.027907	0.155844	0.0198525	0.0965425	0.0750365	-2.58978	-0.194328
	Aster tataricus L. f.	2.1	0.01	10	1.03	0.0195349	0.012987	0.00567215	0.00986496	0.0120148	-4.42162	-0.0531247
	Anaphalis lactea Maxim.	0	0	0	0	0	0	0	0	0	0	0
	Bistorta vivipara (L.) Gray	1.2	0.01	5	1.55	0.0111628	0.012987	0.00283607	0.0148453	0.0104578	-4.56041	-0.0476918
	Pedicularis Linn.	0	0	0	0	0	0	0	0	0	0	0
	Gentiana macrophylla Pall.	0	0	0	0	0	0	0	0	0	0	0
	Saussurea japonica (Thunb.) DC.	0	0	0	0	0	0	0	0	0	0	0
	Ranunculus japonicus Thunb.	1	0.01	6	1.24	0.00930233	0.012987	0.00340329	0.0118763	0.00939222	-4.66787	-0.0438417
		107.5	0.77	1763	104.41
N15-3	Festuca ovina L.	20.1	0.01	8	1.63	0.201	0.0121951	0.00414079	0.0165903	0.0584816	-2.83904	-0.166032	-1.90785	1.90785	13	2.56495	0.743814
	Poa annua L.	25.3	0.15	106	9.05	0.253	0.182927	0.0548654	0.092112	0.145726	-1.92603	-0.280672
	Elymus dahuricus Turcz.	29.5	0.1	72	8.02	0.295	0.121951	0.0372671	0.0816285	0.133962	-2.0102	-0.26929
	Gentiana scabra Bunge	2.9	0.01	4	2.26	0.029	0.0121951	0.00207039	0.0230025	0.016567	-4.10034	-0.0679304
	Potentilla chinensis Ser.	3.1	0.02	29	4.47	0.031	0.0243902	0.0150104	0.0454962	0.0289742	-3.54135	-0.102608
	Taraxacum mongolicum Hand.Mazz.	5.1	0.01	28	4.1	0.051	0.0121951	0.0144928	0.0417303	0.0298545	-3.51142	-0.104832
	Thalictrum aquilegiifolium var. sibiricum Linnaeus	1.1	0.01	8	1.44	0.011	0.0121951	0.00414079	0.0146565	0.0104981	-4.55656	-0.0478352
	Herb of Tibet Lancea	2.3	0.01	20	2.22	0.023	0.0121951	0.010352	0.0225954	0.0170356	-4.07245	-0.0693767
	Carex alatauensis S. R. Zhang	2.4	0.35	1565	32.7	0.024	0.426829	0.810041	0.332824	0.398424	-0.920239	-0.366645
	Oxytropis ochrocephala Bunge	4.3	0.12	56	24.7	0.043	0.146341	0.0289855	0.251399	0.117432	-2.1419	-0.251527
	Aster tataricus L. f.	1.8	0.01	26	3.5	0.018	0.0121951	0.0134576	0.0356234	0.019819	-3.92111	-0.0777126
	Anaphalis lactea Maxim.	0	0	0	0	0	0	0	0	0	0	0
	Bistorta vivipara (L.) Gray	1.1	0.01	6	1.55	0.011	0.0121951	0.00310559	0.0157761	0.0105192	-4.55455	-0.0479102
	Pedicularis Linn.	0	0	0	0	0	0	0	0	0	0	0
	Gentiana macrophylla Pall.	1	0.01	4	2.61	0.01	0.0121951	0.00207039	0.0265649	0.0127076	-4.36556	-0.0554757
	Saussurea japonica (Thunb.) DC.	0	0	0	0	0	0	0	0	0	0	0
	Ranunculus japonicus Thunb.	0	0	0	0	0	0	0	0	0	0	0
		100	0.82	1932	98.25
		100	0.82	1932	98.25
N30
N30-1	Festuca ovina L.	20.4	0.1	81	7.45	0.167076	0.120482	0.0351562	0.0665892	0.0973259	-2.32969	-0.226739	-2.13265	2.13265	17	2.83321	0.75273
	Poa annua L.	25.4	0.15	132	26.02	0.208026	0.180723	0.0572917	0.232571	0.169653	-1.774	-0.300964
	Elymus dahuricus Turcz.	22.3	0.15	127	20.33	0.182637	0.180723	0.0551215	0.181713	0.150049	-1.8968	-0.284612
	Gentiana scabra Bunge	8.7	0.01	12	4.7	0.0712531	0.0120482	0.00520833	0.0420093	0.0326297	-3.42253	-0.111676
	Potentilla chinensis Ser.	3.4	0.01	36	5.5	0.027846	0.0120482	0.015625	0.0491598	0.0261698	-3.64315	-0.0953404
	Taraxacum mongolicum Hand.Mazz.	5.6	0.01	28	4.22	0.045864	0.0120482	0.0121528	0.037719	0.026946	-3.61392	-0.0973807
	Thalictrum aquilegiifolium var. sibiricum Linnaeus	1.1	0.01	12	1.44	0.00900901	0.0120482	0.00520833	0.0128709	0.00978412	-4.62699	-0.0452711
	Herb of Tibet Lancea	2.6	0.01	10	2.1	0.021294	0.0120482	0.00434028	0.0187701	0.0141132	-4.26065	-0.0601312
	Carex alatauensis S. R. Zhang	4.3	0.3	1780	20.3	0.035217	0.361446	0.772569	0.181444	0.337669	-1.08569	-0.366604
	Oxytropis ochrocephala Bunge	7.6	0.01	14	2.61	0.0622441	0.0120482	0.00607639	0.0233286	0.0259243	-3.65257	-0.0946904
	Aster tataricus L. f.	5.4	0.01	17	3.7	0.044226	0.0120482	0.00737847	0.0330711	0.024181	-3.72219	-0.0900061
	Anaphalis lactea Maxim.	7.2	0.01	10	2.47	0.0589681	0.0120482	0.00434028	0.0220772	0.0243584	-3.71488	-0.0904886
	Bistorta vivipara (L.) Gray	1.1	0.01	8	3.11	0.00900901	0.0120482	0.00347222	0.0277976	0.0130818	-4.33654	-0.0567295
	Pedicularis Linn.	3.1	0.01	15	2.03	0.025389	0.0120482	0.00651042	0.0181444	0.015523	-4.16543	-0.0646601
	Gentiana macrophylla Pall.	1.1	0.01	4	2.02	0.00900901	0.0120482	0.00173611	0.0180551	0.0102121	-4.58418	-0.0468141
	Saussurea japonica (Thunb.) DC.	1.2	0.01	5	1.77	0.00982801	0.0120482	0.00217014	0.0158205	0.00996672	-4.6085	-0.0459317
	Ranunculus japonicus Thunb.	1.6	0.01	13	2.11	0.013104	0.0121951	0.00564236	0.0188595	0.0124502	-4.38601	-0.054607
		122.1	0.83	2304	111.88
		122.1	0.83	2304	111.88
N30-2	Festuca ovina L.	20.2	0.05	40	4.45	0.183636	0.060241	0.0160449	0.0389463	0.0747171	-2.59405	-0.19382	-2.01052	2.01052	17	2.83321	0.709624
	Poa annua L.	23.4	0.13	142	21.62	0.212727	0.156627	0.0569595	0.189218	0.153883	-1.87156	-0.288001
	Elymus dahuricus Turcz.	24.1	0.11	122	25.13	0.219091	0.13253	0.048937	0.219937	0.155124	-1.86353	-0.289078
	Gentiana scabra Bunge	6.1	0.01	12	6.7	0.0554545	0.0120482	0.00481348	0.0586382	0.0327386	-3.4192	-0.11194
	Potentilla chinensis Ser.	3.4	0.01	17	3.7	0.0309091	0.0120482	0.00681909	0.0323823	0.0205397	-3.8854	-0.0798048
	Taraxacum mongolicum Hand.Mazz.	4.1	0.02	18	3.22	0.0372727	0.0240964	0.00722022	0.0281813	0.0241927	-3.72171	-0.090038
	Thalictrum aquilegiifolium var. sibiricum Linnaeus	2.7	0.01	21	4.5	0.0245455	0.0120482	0.00842359	0.0393839	0.0211003	-3.85847	-0.0814148
	Herb of Tibet Lancea	1.1	0.01	14	2.33	0.01	0.0120482	0.00561572	0.0203921	0.012014	-4.42168	-0.0531221
	Carex alatauensis S. R. Zhang	3.1	0.38	1979	21.3	0.0281818	0.457831	0.793823	0.186417	0.366563	-1.00358	-0.367877
	Oxytropis ochrocephala Bunge	2.4	0.01	10	6	0.0218182	0.0120482	0.00401123	0.0525118	0.0225974	-3.78992	-0.0856422
	Aster tataricus L. f.	4.1	0.03	62	5.06	0.0372727	0.0361446	0.0248696	0.044285	0.035643	-3.3342	-0.118841
	Anaphalis lactea Maxim.	2.3	0.01	8	1.36	0.0209091	0.0120482	0.00320899	0.0119027	0.0120172	-4.42141	-0.0531332
	Bistorta vivipara (L.) Gray	5.5	0.01	7	2.47	0.05	0.0120482	0.00280786	0.0216174	0.0216184	-3.83421	-0.0828894
	Pedicularis Linn.	3.5	0.01	21	2.01	0.0318182	0.0120482	0.00842359	0.0175915	0.0174704	-4.04725	-0.0707069
	Gentiana macrophylla Pall.	1.1	0.01	5	1.59	0.01	0.0120482	0.00200562	0.0139156	0.00949236	-4.65727	-0.0442085
	Saussurea japonica (Thunb.) DC.	1.3	0.01	5	1.38	0.0118182	0.0120482	0.00200562	0.0120777	0.00948743	-4.65779	-0.0441904
	Ranunculus japonicus Thunb.	1.6	0.01	10	1.44	0.0145455	0.0120482	0.00401123	0.0126028	0.0108019	-4.52803	-0.0489115
		110	0.83	2493	114.26
		110	0.83	2493	114.26
N30-3	Festuca ovina L.	20.8	0.1	72	6.45	0.164038	0.125	0.0298755	0.0611432	0.0950142	-2.35373	-0.223638	-2.04957	2.04957	17	2.83321	0.723407
	Poa annua L.	30.1	0.15	162	16.62	0.237382	0.1875	0.0672199	0.15755	0.162413	-1.81761	-0.295204
	Elymus dahuricus Turcz.	28.3	0.1	112	12.23	0.223186	0.125	0.046473	0.115935	0.127649	-2.05847	-0.262761
	Gentiana scabra Bunge	1.5	0.01	21	3.15	0.0118297	0.0125	0.00871369	0.0298607	0.015726	-4.15244	-0.0653013
	Potentilla chinensis Ser.	6.9	0.01	20	2.06	0.0544164	0.0125	0.00829876	0.0195279	0.0236858	-3.74288	-0.088653
	Taraxacum mongolicum Hand.Mazz.	5.9	0.01	18	3.22	0.04653	0.0125	0.00746888	0.0305242	0.0242558	-3.7191	-0.0902096
	Thalictrum aquilegiifolium var. sibiricum Linnaeus	1.1	0.01	12	1.76	0.00867508	0.0125	0.00497925	0.016684	0.0107096	-4.53662	-0.0485853
	Herb of Tibet Lancea	3.7	0.01	25	2.08	0.0291798	0.0125	0.0103734	0.0197175	0.0179427	-4.02057	-0.0721399
	Carex alatauensis S. R. Zhang	4.1	0.32	1891	33.38	0.0323344	0.4	0.784647	0.316428	0.383352	-0.9588	-0.367559
	Oxytropis ochrocephala Bunge	7.4	0.01	10	6.7	0.0583596	0.0125	0.00414938	0.0635131	0.0346305	-3.36302	-0.116463
	Aster tataricus L. f.	3.4	0.01	17	3.7	0.0268139	0.0125	0.00705394	0.0350744	0.0203606	-3.89416	-0.0792872
	Anaphalis lactea Maxim.	1.2	0.01	8	1.91	0.00946372	0.0125	0.0033195	0.018106	0.0108473	-4.52384	-0.0490714
	Bistorta vivipara (L.) Gray	5.7	0.01	7	4.47	0.0449527	0.0125	0.00290456	0.0423737	0.0256827	-3.66194	-0.0940485
	Pedicularis Linn.	1.5	0.01	8	1.22	0.0118297	0.0125	0.0033195	0.0115651	0.00980356	-4.62501	-0.0453416
	Gentiana macrophylla Pall.	1.8	0.01	7	1.88	0.0141956	0.0125	0.00290456	0.0178216	0.0118554	-4.43497	-0.0525785
	Saussurea japonica (Thunb.) DC.	1.4	0.01	10	3.1	0.011041	0.0125	0.00414938	0.0293867	0.0142693	-4.24965	-0.0606393
	Ranunculus japonicus Thunb.	1.8	0.01	10	1.56	0	0.0125	0.00414938	0.0147881	0.00785938	-4.84605	-0.0380869
		126.6	0.8	2410	105.49
		126.8	0.8	2410	105.49
N45
N45-1	Festuca ovina L.	20.1	0.05	104	13.1	0.165979	0.0574713	0.0540541	0.111908	0.0973531	-2.32941	-0.226775	-1.99392	1.99392	15	2.70805	0.736293
	Poa annua L.	36.7	0.25	201	23	0.303055	0.287356	0.10447	0.19648	0.22284	-1.5013	-0.33455
	Elymus dahuricus Turcz.	33.6	0.31	160	20	0.277457	0.356322	0.0831601	0.170853	0.221948	-1.50531	-0.334101
	Gentiana scabra Bunge	4.7	0.01	9	2.76	0.0388109	0.0114943	0.00467775	0.0235777	0.0196401	-3.93018	-0.0771893
	Potentilla chinensis Ser.	3.1	0.01	11	6.12	0.0255987	0.0114943	0.00571726	0.0522809	0.0237728	-3.73921	-0.0888915
	Taraxacum mongolicum Hand.Mazz.	5.7	0.01	8	2.17	0.0470685	0.0114943	0.004158	0.0185375	0.0203146	-3.89642	-0.079154
	Thalictrum aquilegiifolium var. sibiricum Linnaeus	1.7	0.01	15	9.81	0.014038	0.0114943	0.00779626	0.0838032	0.0292829	-3.53075	-0.103391
	Herb of Tibet Lancea	1.4	0.01	13	4.1	0.0115607	0.0114943	0.00675676	0.0350248	0.0162091	-4.12218	-0.0668169
	Carex alatauensis S. R. Zhang	3.2	0.15	1341	15	0.0264244	0.172414	0.696985	0.128139	0.255991	-1.36261	-0.348817
	Oxytropis ochrocephala Bunge	4.2	0.01	7	6	0.0346821	0.0114943	0.00363825	0.0512558	0.0252676	-3.67823	-0.0929401
	Aster tataricus L. f.	1.3	0.01	10	3.3	0.0107349	0.0114943	0.00519751	0.0281907	0.0139043	-4.27555	-0.0594488
	Anaphalis lactea Maxim.	1.4	0.01	8	1.42	0.0115607	0.0114943	0.004158	0.0121305	0.00983587	-4.62172	-0.0454586
	Bistorta vivipara (L.) Gray	1.2	0.01	10	1.65	0.00990917	0.0114943	0.00519751	0.0140953	0.0101741	-4.58791	-0.0466777
	Pedicularis Linn.	1.5	0.01	9	1.52	0.0123865	0.0114943	0.00467775	0.0129848	0.0103858	-4.56731	-0.0474353
	Gentiana macrophylla Pall.	1.3	0.01	8	1.11	0.0107349	0.0114943	0.004158	0.00948232	0.00896738	-4.71416	-0.0422737
	Saussurea japonica (Thunb.) DC.	0	0	0	0	0	0	0	0	0	0	0
	Ranunculus japonicus Thunb.	0	0	0	0	0	0	0	0	0	0	0
		121.1	0.87	1914	111.06
		121.1	0.87	1924	117.06
	Festuca ovina L.	23.4	0.06	62	9.1	0.192118	0.0731707	0.0329087	0.0742191	0.0931042	-2.37404	-0.221033	-1.85399	1.85399	15	2.70805	0.684623
N45-2	Poa annua L.	25.9	0.35	300	32.1	0.212644	0.426829	0.159236	0.261806	0.265129	-1.32754	-0.351969
	Elymus dahuricus Turcz.	26.9	0.15	134	14.2	0.220854	0.182927	0.0711253	0.115814	0.14768	-1.91271	-0.282469
	Gentiana scabra Bunge	6.1	0.01	11	8.2	0.0500821	0.0121951	0.00583864	0.0668787	0.0337486	-3.38881	-0.114368
	Potentilla chinensis Ser.	6.3	0.01	10	6.1	0.0517241	0.0121951	0.00530786	0.0497512	0.0297446	-3.51511	-0.104555
	Taraxacum mongolicum Hand.Mazz.	4.3	0.01	8	6.1	0.0353038	0.0121951	0.00424628	0.0497512	0.0253741	-3.67403	-0.0932251
	Thalictrum aquilegiifolium var. sibiricum Linnaeus	1.4	0.01	12	2.1	0.0114943	0.0121951	0.00636943	0.0171275	0.0117966	0	0
	Herb of Tibet Lancea	3.1	0.01	7	5.2	0.0254516	0.0121951	0.0037155	0.0424109	0.0209433	-3.86594	-0.0809654
	Carex alatauensis S. R. Zhang	3.9	0.15	1272	20.61	0.0320197	0.182927	0.675159	0.168094	0.26455	-1.32973	-0.351779
	Oxytropis ochrocephala Bunge	5.1	0.01	9	5.4	0.0418719	0.0121951	0.00477707	0.0440421	0.0257215	-3.66043	-0.0941518
	Aster tataricus L. f.	3.9	0.01	21	4.7	0.0320197	0.0121951	0.0111465	0.0383329	0.0234236	-3.75401	-0.0879324
	Anaphalis lactea Maxim.	2.3	0.01	10	2.1	0.0188834	0.0121951	0.00530786	0.0171275	0.0133785	0	0
	Bistorta vivipara (L.) Gray	3.4	0.01	11	1.7	0	0	0	0.0138651	0.00346628	0	0
	Pedicularis Linn.	2.4	0.01	8	1.8	0.0197044	0.0121951	0.00424628	0.0146807	0.0127066	0	0
	Gentiana macrophylla Pall.	3.4	0.01	9	3.2	0.0279146	0.0121951	0.00477707	0.026099	0.0177465	-4.03157	-0.0715461
	Saussurea japonica (Thunb.) DC.	0	0	0	0	0	0	0	0	0	0	0
	Ranunculus japonicus Thunb.	0	0	0	0	0	0	0	0	0	0	0
		121.8	0.82	1884	122.61
N45-3	Festuca ovina L.	20.4	0.06	54	8.12	0.163855	0.0697674	0.0270812	0.0557271	0.0791078	-2.53694	-0.200692	-2.02262	2.02262	15	2.70805	0.746891
	Poa annua L.	26.1	0.35	340	39.2	0.209639	0.406977	0.170512	0.269028	0.264039	-1.33166	-0.35161
	Elymus dahuricus Turcz.	30.4	0.15	187	28.3	0.244177	0.174419	0.0937813	0.194221	0.17665	-1.73359	-0.306237
	Gentiana scabra Bunge	6.2	0.01	8	5.93	0.0497992	0.0116279	0.00401204	0.0406973	0.0265341	-3.62932	-0.0963009
	Potentilla chinensis Ser.	3.2	0.01	9	6.51	0.0257028	0.0116279	0.00451354	0.0446778	0.0216305	-3.83365	-0.0829238
	Taraxacum mongolicum Hand.Mazz.	5.4	0.05	38	9.66	0.0433735	0.0581395	0.0190572	0.0662961	0.0467166	-3.06366	-0.143124
	Thalictrum aquilegiifolium var. sibiricum Linnaeus	1.2	0.01	10	2.3	0.00963855	0.0116279	0.00501505	0.0157848	0.0105166	-4.5548	-0.0479009
	Herb of Tibet Lancea	5.4	0.01	11	3.71	0.0433735	0.0116279	0.00551655	0.0254615	0.0214949	-3.83994	-0.082539
	Carex alatauensis S. R. Zhang	4.1	0.15	1286	20.78	0.0329317	0.174419	0.644935	0.142612	0.248724	-1.39141	-0.346078
	Oxytropis ochrocephala Bunge	4.7	0.01	8	6.9	0.037751	0.0116279	0.00401204	0.0473543	0.0251863	-3.68145	-0.0927223
	Aster tataricus L. f.	6.9	0.01	7	4.22	0.0554217	0.0116279	0.00351053	0.0289616	0.0248804	-3.69367	-0.0919002
	Anaphalis lactea Maxim.	6.5	0.01	9	3.38	0.0522088	0.0116279	0.00451354	0.0231968	0.0228868	-3.7772	-0.0864478
	Bistorta vivipara (L.) Gray	1.5	0.01	9	2.55	0.0120482	0.0116279	0.00451354	0.0175005	0.0114225	-4.47217	-0.0510835
	Pedicularis Linn.	0	0	0	0	0	0	0	0	0	0	0
	Gentiana macrophylla Pall.	0	0	0	0	0	0	0	0	0	0	0
	Saussurea japonica (Thunb.) DC.	1.3	0.01	8	1.55	0.0104418	0.0116279	0.00401204	0.0106376	0.00917982	-4.69075	-0.0430602
	Ranunculus japonicus Thunb.	1.2	0.01	10	2.6	0.00963855	0.0116279	0.00501505	0.0178437	0.0110313	-4.50702	-0.0497182
		124.5	0.86	1994	145.71
		124.5	0.86	1994	145.71
N60
N60-1	Festuca ovina L.	10	0.07	52	8.36	0.103093	0.0864198	0.0581655	0.0743111	0.0804973	-2.51953	-0.202815	-1.69445	1.69445	10	2.30259	0.735892
	Poa annua L.	33.9	0.3	307	30.91	0.349485	0.37037	0.3434	0.275859	0.334779	-1.09429	-0.366343
	Elymus dahuricus Turcz.	18.1	0.4	401	40.01	0.186598	0.493827	0.448546	0.357073	0.371511	-0.990177	-0.367862
	Gentiana scabra Bunge	5	0.01	8	4.4	0.0515464	0.0123457	0.00894855	0.0392682	0.0280272	-3.57458	-0.100185
	Potentilla chinensis Ser.	8.1	0.02	11	6.01	0.0835052	0.0246914	0.0123043	0.0536368	0.0435344	-3.1342	-0.136446
	Taraxacum mongolicum Hand.Mazz.	5	0.01	4	3.1	0.0515464	0.0123457	0.00447427	0.0276662	0.0240081	-3.72936	-0.0895351
	Thalictrum aquilegiifolium var. sibiricum Linnaeus	0	0	0	0	0	0	0	0	0	0	0
	Herb of Tibet Lancea	2.4	0.01	11	2.71	0.0247423	0.0123457	0.0123043	0.0241856	0.0183945	-3.99571	-0.0734988
	Carex alatauensis S. R. Zhang	6.2	0.01	78	2.02	0.0639175	0.0123457	0.0872483	0.0180277	0.0453848	-3.09258	-0.140356
	Oxytropis ochrocephala Bunge	5.9	0.01	7	6.31	0.0608247	0.0123457	0.00782998	0.0563141	0.0343286	-3.37178	-0.115748
	Aster tataricus L. f.	4.8	0.01	6	5.14	0.0494845	0.0123457	0.00671141	0.0458724	0.0286035	-3.55423	-0.101663
	Anaphalis lactea Maxim.	0	0	0	0	0	0	0	0	0	0	0
	Bistorta vivipara (L.) Gray	0	0	0	0	0	0	0	0	0	0	0
	Pedicularis Linn.	0	0	0	0	0	0	0	0	0	0	0
	Gentiana macrophylla Pall.	0	0	0	0	0	0	0	0	0	0	0
	Saussurea japonica (Thunb.) DC.	0	0	0	0	0	0	0	0	0	0	0
	Ranunculus japonicus Thunb.	0	0	0	0	0	0	0	0	0	0	0
		99.4	0.85	885	108.97
N60-2	Festuca ovina L.	10	0.01	11	2.2	0.100604	0.0117647	0.0124294	0.020189	0.0362467	-3.31741	-0.120245	-1.3314	1.3314	10	2.30259	0.578218
	Poa annua L.	30.1	0.3	330	31.92	0.302817	0.352941	0.372881	0.292925	0.330391	-1.10748	-0.365901
	Elymus dahuricus Turcz.	29.3	0.41	441	50.2	0.294769	0.482353	0.498305	0.460677	0.434026	-0.834651	-0.36226
	Gentiana scabra Bunge	7.9	0.05	12	6.11	0.0794769	0.0588235	0.0135593	0.0560705	0.0519825	-2.95685	-0.153704
	Potentilla chinensis Ser.	4.3	0.01	5	2.14	0.0432596	0.0117647	0.00564972	0.0196384	0.0200781	-3.90813	-0.0784677
	Taraxacum mongolicum Hand.Mazz.	4.4	0.03	13	8.1	0.0442656	0.0352941	0.0146893	0.0743324	0.0421453	-3.16663	-0.133459
	Thalictrum aquilegiifolium var. sibiricum Linnaeus	0	0	0	0	0	0	0	0	0	0	0
	Herb of Tibet Lancea	2	0.01	10	1.75	0.0201207	0.0117647	0.0112994	0.0160595	0.0148111	-4.21238	-0.0623899
	Carex alatauensis S. R. Zhang	6.3	0.01	55	1.07	0.0633803	0.0117647	0.0621469	0.00981922	0.0367778	-3.30286	-0.121472
	Oxytropis ochrocephala Bunge	3	0.01	3	2.48	0.0301811	0.0117647	0.00338983	0.0227586	0.0170235	-4.07316	-0.0693396
	Aster tataricus L. f.	2.1	0.01	5	3	0.0211268	0.0117647	0.00564972	0.0275305	0.0165179	0.0165179	0.0155962
	Anaphalis lactea Maxim.	0	0	0	0	0	0	0	0	0	0	0
	Bistorta vivipara (L.) Gray	0	0	0	0	0	0	0	0	0	0	0
	Pedicularis Linn.	0	0	0	0	0	0	0	0	0	0	0
	Gentiana macrophylla Pall.	0	0	0	0	0	0	0	0	0	0	0
	Saussurea japonica (Thunb.) DC.	0	0	0	0	0	0	0	0	0	0	0
	Ranunculus japonicus Thunb.	0	0	0	0	0	0	0	0	0	0	0
		99.4	0.85	885	108.97
N60-3	Festuca ovina L.	10.6	0.1	44	8.12	0.104743	0.123457	0.0502283	0.0725583	0.0877466	-2.4333	-0.213514	-1.73	1.73	10	2.30259	0.751329
	Poa annua L.	30.6	0.26	387	30.13	0.302372	0.320988	0.441781	0.269234	0.333594	-1.09783	-0.36623
	Elymus dahuricus Turcz.	30.1	0.33	324	38.04	0.297431	0.407407	0.369863	0.339916	0.353654	-1.03944	-0.367601
	Gentiana scabra Bunge	2	0.01	5	2.9	0.0197628	0.0123457	0.00570776	0.0259137	0.0159325	-4.13939	-0.0659509
	Potentilla chinensis Ser.	2.3	0.01	5	3.42	0.0227273	0.0123457	0.00570776	0.0305603	0.0178352	-4.02658	-0.071815
	Taraxacum mongolicum Hand.Mazz.	6.1	0.05	12	8	0.0602767	0.0617284	0.0136986	0.071486	0.0517974	-2.96041	-0.153342
	Thalictrum aquilegiifolium var. sibiricum Linnaeus	0	0	0	0	0	0	0	0	0	0	0
	Herb of Tibet Lancea	2	0.01	10	1.75	0.0197628	0.0123457	0.0114155	0.0156376	0.0147904	-4.21378	-0.0623235
	Carex alatauensis S. R. Zhang	5.7	0.01	74	1.21	0.0563241	0.0123457	0.0844749	0.0108123	0.0409892	-3.19445	-0.130938
	Oxytropis ochrocephala Bunge	5.7	0.01	3	1.8	0.0563241	0.0123457	0.00342466	0.0160844	0.0220447	-3.81468	-0.0840935
	Aster tataricus L. f.	4.8	0.01	6	5.14	0.0474308	0.0123457	0.00684932	0.0459298	0.0281389	-3.5706	-0.100473
	Anaphalis lactea Maxim.	1.3	0.01	6	11.4	0.0128458	0.0123457	0.00684932	0.101868	0.0334771	-3.39689	-0.113718
	Bistorta vivipara (L.) Gray	0	0	0	0	0	0	0	0	0	0	0
	Pedicularis Linn.	0	0	0	0	0	0	0	0	0	0	0
	Gentiana macrophylla Pall.	0	0	0	0	0	0	0	0	0	0	0
	Saussurea japonica (Thunb.) DC.	0	0	0	0	0	0	0	0	0	0	0
	Ranunculus japonicus Thunb.	0	0	0	0	0	0	0	0	0	0	0
		101.2	0.81	876	111.91

## Sheet: Important value of function gro
CK			Plant height	coverage	density	Dry weight	Relative heigh	Relative coverage	Relative density	Relative biomass	Importance value
CK-1	grasses	Festuca ovina L.	17.8	0.02	23	2.53	0.78595	0.189189	0.0781174	0.149271	0.300632
		Poa annua L.	16.4	0.1	87	8.7
		Elymus dahuricus Turcz.	37.4	0.02	51	6.39
	sedges	Carex alatauensis S. R. Zhang	1.6	0.38	1780	50.01	0.0175631	0.513514	0.863658	0.42367	0.454601
	forbs	Potentilla chinensis Ser.	1.2	0.03	27	12.32	0.196487	0.810811	0.0582242	0.427059	0.373145
		Taraxacum mongolicum Hand.Mazz.	2.6	0.01	20	8.31
		Thalictrum aquilegiifolium var. sibiricum Linnaeus	1.2	0.01	10	3.21
		Herb of Tibet Lancea	1.1	0.01	20	3.7
		Oxytropis ochrocephala Bunge	1.2	0.03	8	3.7
		Aster tataricus L. f.	1.4	0.1	9	8.3
		Anaphalis lactea Maxim.	0	0	0	0
		Bistorta vivipara (L.) Gray	0	0	0	0
		Pedicularis Linn.	1.7	0.01	10	3.1
		Gentiana macrophylla Pall.	0	0	0	0
		Saussurea japonica (Thunb.) DC.	0	0	0	0
		Ranunculus japonicus Thunb.	1.1	0.01	10	2.03
		Gentiana scabra Bunge	6.4	0.01	6	5.74
			91.1	0.74	2061	118.04
CK-2	grasses	Festuca ovina L.	18.6	0.01	13	1.57	0.809927	0.258065	0.0640884	0.120249	0.313082
		Poa annua L.	17.1	0.1	62	5.14
		Elymus dahuricus Turcz.	31.2	0.05	41	5.09
	sedges	Carex alatauensis S. R. Zhang	1.1	0.35	1550	41.1	0.0133172	0.564516	0.856354	0.418832	0.463255
	forbs	Potentilla chinensis Ser.	2.6	0.01	12	8.4	0.176755	0.177419	0.079558	0.460919	0.223663
		Taraxacum mongolicum Hand.Mazz.	3.6	0.01	28	2.4
		Thalictrum aquilegiifolium var. sibiricum Linnaeus	1.5	0.01	30	2.3
		Herb of Tibet Lancea	0	0	0	0
		Oxytropis ochrocephala Bunge	1.2	0.01	25	2.21
		Aster tataricus L. f.	1.3	0.03	24	15.3
		Anaphalis lactea Maxim.	1.1	0.01	14	11.42
		Bistorta vivipara (L.) Gray	0	0	0	0
		Pedicularis Linn.	1.2	0.01	3	1.1
		Gentiana macrophylla Pall.	0	0	0	0
		Saussurea japonica (Thunb.) DC.	0	0	0	0
		Ranunculus japonicus Thunb.	1.1	0.01	4	1.1
			1	0.01	4	1
			82.6	0.62	1810	98.13
CK-3	grasses	Festuca ovina L.	15.6	0.01	13	3.11	0.690187	0.313433	0.0778936	0.172326	0.31346
		Poa annua L.	20.3	0.1	67	5.14
		Elymus dahuricus Turcz.	26.7	0.1	62	6.01
	sedges	Carex alatauensis S. R. Zhang	1.6	0.35	1548	30.1	0.0176406	0.522388	0.84915	0.363746	0.438231
	forbs	Potentilla chinensis Ser.	7.3	0.01	12	7.84	0.292172	0.164179	0.0729567	0.463927	0.248309
		Taraxacum mongolicum Hand.Mazz.	1.2	0.01	2	1.2
		Thalictrum aquilegiifolium var. sibiricum Linnaeus	2.1	0.01	16	4.33
		Herb of Tibet Lancea	1.1	0.01	4	1
		Oxytropis ochrocephala Bunge	2.1	0.01	21	2.7
		Aster tataricus L. f.	1.4	0.01	12	1.8
		Anaphalis lactea Maxim.	1.8	0.03	32	14.32
		Bistorta vivipara (L.) Gray	8.2	0.01	26	3.1
		Pedicularis Linn.	0	0	0	0
		Gentiana macrophylla Pall.	0	0	0	0
		Saussurea japonica (Thunb.) DC.	0	0	0	0
		Ranunculus japonicus Thunb.	0	0	0	0
			1.3	0.01	8	2.1
			90.7	0.67	1823	82.75
N15
N15-1	grasses	Festuca ovina L.	21.4	0.01	12	1.13	0.671206	0.2625	0.0495101	0.298104	0.32033
		Poa annua L.	26.7	0.15	44	19.11
		Elymus dahuricus Turcz.	20.9	0.05	40	10.11
	sedges	Carex alatauensis S. R. Zhang	2.9	0.33	1630	26.83	0.0282101	0.4125	0.84064	0.26353	0.38622
	forbs	Potentilla chinensis Ser.	7.5	0.01	20	8.81	0.275292	0.325	0.10985	0.438366	0.287127
		Taraxacum mongolicum Hand.Mazz.	3.6	0.05	60	3.1
		Thalictrum aquilegiifolium var. sibiricum Linnaeus	3.6	0.01	27	6.02
		Herb of Tibet Lancea	2.5	0.01	11	3.2
		Oxytropis ochrocephala Bunge	2.4	0.01	5	5.8
		Aster tataricus L. f.	2.7	0.1	50	9.7
		Anaphalis lactea Maxim.	3.9	0.05	26	5.9
		Bistorta vivipara (L.) Gray	0	0	0	0
		Pedicularis Linn.	1	0.01	10	1.1
		Gentiana macrophylla Pall.	0	0	0	0
		Saussurea japonica (Thunb.) DC.	0	0	0	0
		Ranunculus japonicus Thunb.	1.1	0.01	4	1
			0	0	0	0
			102.8	0.8	1939	101.81
N15-2	grasses	Festuca ovina L.	20.3	0.01	8	1.13	0.732093	0.337662	0.110607	0.357245	0.384402
		Poa annua L.	29.7	0.15	115	30.15
		Elymus dahuricus Turcz.	28.7	0.1	72	6.02
	sedges	Carex alatauensis S. R. Zhang	3.5	0.3	1401	30.4	0.0325581	0.38961	0.794668	0.29116	0.376999
	forbs	Potentilla chinensis Ser.	2.9	0.01	24	5.01	0.235349	0.272727	0.0947249	0.351595	0.238599
		Taraxacum mongolicum Hand.Mazz.	3.1	0.02	8	5.18
		Thalictrum aquilegiifolium var. sibiricum Linnaeus	6.2	0.01	23	7.2
		Herb of Tibet Lancea	2.2	0.01	30	3.2
		Oxytropis ochrocephala Bunge	3.6	0.01	26	2.22
		Aster tataricus L. f.	3	0.12	35	10.08
		Anaphalis lactea Maxim.	2.1	0.01	10	1.03
		Bistorta vivipara (L.) Gray	0	0	0	0
		Pedicularis Linn.	1.2	0.01	5	1.55
		Gentiana macrophylla Pall.	0	0	0	0
		Saussurea japonica (Thunb.) DC.	0	0	0	0
		Ranunculus japonicus Thunb.	0	0	0	0
			1	0.01	6	1.24
			107.5	0.77	1763	104.41
N15-3	grasses	Festuca ovina L.	20.1	0.01	8	1.63	0.749	0.317073	0.0962733	0.190331	0.338169
		Poa annua L.	25.3	0.15	106	9.05
		Elymus dahuricus Turcz.	29.5	0.1	72	8.02
	sedges	Carex alatauensis S. R. Zhang	2.4	0.35	1565	32.7	0.024	0.426829	0.810041	0.332824	0.398424
	forbs	Potentilla chinensis Ser.	2.9	0.01	4	2.26	0.227	0.256098	0.0936853	0.476845	0.263407
		Taraxacum mongolicum Hand.Mazz.	3.1	0.02	29	4.47
		Thalictrum aquilegiifolium var. sibiricum Linnaeus	5.1	0.01	28	4.1
		Herb of Tibet Lancea	1.1	0.01	8	1.44
		Oxytropis ochrocephala Bunge	2.3	0.01	20	2.22
		Aster tataricus L. f.	4.3	0.12	56	24.7
		Anaphalis lactea Maxim.	1.8	0.01	26	3.5
		Bistorta vivipara (L.) Gray	0	0	0	0
		Pedicularis Linn.	1.1	0.01	6	1.55
		Gentiana macrophylla Pall.	0	0	0	0
		Saussurea japonica (Thunb.) DC.	1	0.01	4	2.61
		Ranunculus japonicus Thunb.	0	0	0	0
			0	0	0	0
			100	0.82	1932	98.25
			100	0.82	1932	98.25
N30
N30-1	grasses	Festuca ovina L.	20.4	0.1	81	7.45	0.55774	0.481928	0.147569	0.480872	0.417027
		Poa annua L.	25.4	0.15	132	26.02
		Elymus dahuricus Turcz.	22.3	0.15	127	20.33
	sedges	Carex alatauensis S. R. Zhang	4.3	0.3	1780	20.3	0.035217	0.361446	0.772569	0.181444	0.337669
	forbs	Potentilla chinensis Ser.	8.7	0.01	12	4.7	0.407043	0.156627	0.0798611	0.337683	0.245304
		Taraxacum mongolicum Hand.Mazz.	3.4	0.01	36	5.5
		Thalictrum aquilegiifolium var. sibiricum Linnaeus	5.6	0.01	28	4.22
		Herb of Tibet Lancea	1.1	0.01	12	1.44
		Oxytropis ochrocephala Bunge	2.6	0.01	10	2.1
		Aster tataricus L. f.	7.6	0.01	14	2.61
		Anaphalis lactea Maxim.	5.4	0.01	17	3.7
		Bistorta vivipara (L.) Gray	7.2	0.01	10	2.47
		Pedicularis Linn.	1.1	0.01	8	3.11
		Gentiana macrophylla Pall.	3.1	0.01	15	2.03
		Saussurea japonica (Thunb.) DC.	1.1	0.01	4	2.02
		Ranunculus japonicus Thunb.	1.2	0.01	5	1.77
			1.6	0.01	13	2.11
			122.1	0.83	2304	111.88
			122.1	0.83	2304	111.88
N30-2	grasses	Festuca ovina L.	20.2	0.05	40	4.45	0.615455	0.349398	0.121941	0.448101	0.383724
		Poa annua L.	23.4	0.13	142	21.62
		Elymus dahuricus Turcz.	24.1	0.11	122	25.13
	sedges	Carex alatauensis S. R. Zhang	3.1	0.38	1979	21.3	0.0281818	0.457831	0.793823	0.186417	0.366563
	forbs	Potentilla chinensis Ser.	6.1	0.01	12	6.7	0.356364	0.192771	0.0842359	0.365482	0.249713
		Taraxacum mongolicum Hand.Mazz.	3.4	0.01	17	3.7
		Thalictrum aquilegiifolium var. sibiricum Linnaeus	4.1	0.02	18	3.22
		Herb of Tibet Lancea	2.7	0.01	21	4.5
		Oxytropis ochrocephala Bunge	1.1	0.01	14	2.33
		Aster tataricus L. f.	2.4	0.01	10	6
		Anaphalis lactea Maxim.	4.1	0.03	62	5.06
		Bistorta vivipara (L.) Gray	2.3	0.01	8	1.36
		Pedicularis Linn.	5.5	0.01	7	2.47
		Gentiana macrophylla Pall.	3.5	0.01	21	2.01
		Saussurea japonica (Thunb.) DC.	1.1	0.01	5	1.59
		Ranunculus japonicus Thunb.	1.3	0.01	5	1.38
			1.6	0.01	10	1.44
			110	0.83	2493	114.26
			110	0.83	2493	114.26
N30-3	grasses	Festuca ovina L.	20.8	0.1	72	6.45	0.624606	0.4375	0.143568	0.334629	0.385076
		Poa annua L.	30.1	0.15	162	16.62
		Elymus dahuricus Turcz.	28.3	0.1	112	12.23
	sedges	Carex alatauensis S. R. Zhang	4.1	0.32	1891	33.38	0.0323344	0.4	0.784647	0.316428	0.383352
	forbs	Potentilla chinensis Ser.	1.5	0.01	21	3.15	0.341483	0.1625	0.0717842	0.348943	0.231177
		Taraxacum mongolicum Hand.Mazz.	6.9	0.01	20	2.06
		Thalictrum aquilegiifolium var. sibiricum Linnaeus	5.9	0.01	18	3.22
		Herb of Tibet Lancea	1.1	0.01	12	1.76
		Oxytropis ochrocephala Bunge	3.7	0.01	25	2.08
		Aster tataricus L. f.	7.4	0.01	10	6.7
		Anaphalis lactea Maxim.	3.4	0.01	17	3.7
		Bistorta vivipara (L.) Gray	1.2	0.01	8	1.91
		Pedicularis Linn.	5.7	0.01	7	4.47
		Gentiana macrophylla Pall.	1.5	0.01	8	1.22
		Saussurea japonica (Thunb.) DC.	1.8	0.01	7	1.88
		Ranunculus japonicus Thunb.	1.4	0.01	10	3.1
			1.8	0.01	10	1.56
			126.6	0.8	2410	105.49
			126.8	0.8	2410	105.49
N45
N45-1	grasses	Festuca ovina L.	20.1	0.05	104	13.1	0.746491	0.701149	0.242947	0.505132	0.54893
		Poa annua L.	36.7	0.25	201	23
		Elymus dahuricus Turcz.	33.6	0.31	160	20
	sedges	Carex alatauensis S. R. Zhang	3.2	0.15	1341	15	0.0264244	0.172414	0.700627	0.135062	0.258632
	forbs	Potentilla chinensis Ser.	4.7	0.01	9	2.76	0.227085	0.126437	0.0564263	0.359806	0.192438
		Taraxacum mongolicum Hand.Mazz.	3.1	0.01	11	6.12
		Thalictrum aquilegiifolium var. sibiricum Linnaeus	5.7	0.01	8	2.17
		Herb of Tibet Lancea	1.7	0.01	15	9.81
		Oxytropis ochrocephala Bunge	1.4	0.01	13	4.1
		Aster tataricus L. f.	4.2	0.01	7	6
		Anaphalis lactea Maxim.	1.3	0.01	10	3.3
		Bistorta vivipara (L.) Gray	1.4	0.01	8	1.42
		Pedicularis Linn.	1.2	0.01	10	1.65
		Gentiana macrophylla Pall.	1.5	0.01	9	1.52
		Saussurea japonica (Thunb.) DC.	1.3	0.01	8	1.11
		Ranunculus japonicus Thunb.	0	0	0	0
			0	0	0	0
			121.1	0.87	1914	111.06
			121.1	0.87	1924	117.06
N45-2	grasses	Festuca ovina L.	23.4	0.06	62	9.1	0.625616	0.682927	0.26327	0.451839	0.505913
		Poa annua L.	25.9	0.35	300	32.1
		Elymus dahuricus Turcz.	26.9	0.15	134	14.2
	sedges	Carex alatauensis S. R. Zhang	3.9	0.15	1272	20.61	0.0320197	0.182927	0.675159	0.168094	0.26455
	forbs	Potentilla chinensis Ser.	6.1	0.01	11	8.2	0.342365	0.134146	0.0615711	0.380067	0.229537
		Taraxacum mongolicum Hand.Mazz.	6.3	0.01	10	6.1
		Thalictrum aquilegiifolium var. sibiricum Linnaeus	4.3	0.01	8	6.1
		Herb of Tibet Lancea	1.4	0.01	12	2.1
		Oxytropis ochrocephala Bunge	3.1	0.01	7	5.2
		Aster tataricus L. f.	5.1	0.01	9	5.4
		Anaphalis lactea Maxim.	3.9	0.01	21	4.7
		Bistorta vivipara (L.) Gray	2.3	0.01	10	2.1
		Pedicularis Linn.	3.4	0.01	11	1.7
		Gentiana macrophylla Pall.	2.4	0.01	8	1.8
		Saussurea japonica (Thunb.) DC.	3.4	0.01	9	3.2
		Ranunculus japonicus Thunb.	0	0	0	0
			0	0	0	0
			121.8	0.82	1884	122.61
N45-3	grasses	Festuca ovina L.	20.4	0.06	54	8.12	0.617671	0.651163	0.291374	0.518976	0.519796
		Poa annua L.	26.1	0.35	340	39.2
		Elymus dahuricus Turcz.	30.4	0.15	187	28.3
	sedges	Carex alatauensis S. R. Zhang	4.1	0.15	1286	20.78	0.0329317	0.174419	0.644935	0.142612	0.248724
	forbs	Potentilla chinensis Ser.	6.2	0.01	8	5.93	0.349398	0.174419	0.0636911	0.338412	0.23148
		Taraxacum mongolicum Hand.Mazz.	3.2	0.01	9	6.51
		Thalictrum aquilegiifolium var. sibiricum Linnaeus	5.4	0.05	38	9.66
		Herb of Tibet Lancea	1.2	0.01	10	2.3
		Oxytropis ochrocephala Bunge	5.4	0.01	11	3.71
		Aster tataricus L. f.	4.7	0.01	8	6.9
		Anaphalis lactea Maxim.	6.9	0.01	7	4.22
		Bistorta vivipara (L.) Gray	6.5	0.01	9	3.38
		Pedicularis Linn.	1.5	0.01	9	2.55
		Gentiana macrophylla Pall.	0	0	0	0
		Saussurea japonica (Thunb.) DC.	0	0	0	0
		Ranunculus japonicus Thunb.	1.3	0.01	8	1.55
			1.2	0.01	10	2.6
			124.5	0.86	1994	145.71
			124.5	0.86	1994	145.71
N60
N60-1	grasses	Festuca ovina L.	10	0.07	52	8.36	0.623742	0.905882	0.858757	0.72754	0.77898
		Poa annua L.	33.9	0.3	307	30.91
		Elymus dahuricus Turcz.	18.1	0.4	401	40.01
	sedges	Carex alatauensis S. R. Zhang	6.2	0.01	78	2.02	0.0623742	0.0117647	0.0881356	0.0185372	0.0452029
	forbs	Potentilla chinensis Ser.	5	0.01	8	4.4	0.313883	0.0823529	0.0531073	0.253923	0.175817
		Taraxacum mongolicum Hand.Mazz.	8.1	0.02	11	6.01
		Thalictrum aquilegiifolium var. sibiricum Linnaeus	5	0.01	4	3.1
		Herb of Tibet Lancea	0	0	0	0
		Oxytropis ochrocephala Bunge	2.4	0.01	11	2.71
		Aster tataricus L. f.	5.9	0.01	7	6.31
		Anaphalis lactea Maxim.	4.8	0.01	6	5.14
		Bistorta vivipara (L.) Gray	0	0	0	0
		Pedicularis Linn.	0	0	0	0
		Gentiana macrophylla Pall.	0	0	0	0
		Saussurea japonica (Thunb.) DC.	0	0	0	0
		Ranunculus japonicus Thunb.	0	0	0	0
			0	0	0	0
			99.4	0.85	885	108.97
N60-2	grasses	Festuca ovina L.	10	0.01	11	2.2	0.698189	0.847059	0.883616	0.773791	0.800664
		Poa annua L.	30.1	0.3	330	31.92
		Elymus dahuricus Turcz.	29.3	0.41	441	50.2
	sedges	Carex alatauensis S. R. Zhang	6.3	0.01	55	1.07	0.0633803	0.0117647	0.0621469	0.00981922	0.0367778
	forbs	Potentilla chinensis Ser.	7.9	0.05	12	6.11	0.238431	0.141176	0.0542373	0.21639	0.162559
		Taraxacum mongolicum Hand.Mazz.	4.3	0.01	5	2.14
		Thalictrum aquilegiifolium var. sibiricum Linnaeus	4.4	0.03	13	8.1
		Herb of Tibet Lancea	0	0	0	0
		Oxytropis ochrocephala Bunge	2	0.01	10	1.75
		Aster tataricus L. f.	3	0.01	3	2.48
		Anaphalis lactea Maxim.	2.1	0.01	5	3
		Bistorta vivipara (L.) Gray	0	0	0	0
		Pedicularis Linn.	0	0	0	0
		Gentiana macrophylla Pall.	0	0	0	0
		Saussurea japonica (Thunb.) DC.	0	0	0	0
		Ranunculus japonicus Thunb.	0	0	0	0
			0	0	0	0
			99.4	0.85	885	108.97
N60-3	grasses	Festuca ovina L.	10.6	0.1	44	8.12	0.704545	0.851852	0.861872	0.681709	0.774994
		Poa annua L.	30.6	0.26	387	30.13
		Elymus dahuricus Turcz.	30.1	0.33	324	38.04
	sedges	Carex alatauensis S. R. Zhang	5.7	0.01	74	1.21	0.0563241	0.0123457	0.0844749	0.0108123	0.0409892
	forbs	Potentilla chinensis Ser.	2	0.01	5	2.9	0.23913	0.135802	0.053653	0.307479	0.184016
		Taraxacum mongolicum Hand.Mazz.	2.3	0.01	5	3.42
		Thalictrum aquilegiifolium var. sibiricum Linnaeus	6.1	0.05	12	8
		Herb of Tibet Lancea	0	0	0	0
		Oxytropis ochrocephala Bunge	2	0.01	10	1.75
		Aster tataricus L. f.	5.7	0.01	3	1.8
		Anaphalis lactea Maxim.	4.8	0.01	6	5.14
		Bistorta vivipara (L.) Gray	1.3	0.01	6	11.4
		Pedicularis Linn.	0	0	0	0
		Gentiana macrophylla Pall.	0	0	0	0
		Saussurea japonica (Thunb.) DC.	0	0	0	0
		Ranunculus japonicus Thunb.	0	0	0	0
			0	0	0	0
			101.2	0.81	876	111.91
